# Supplementary material
Source: publisher figshare collection journal article supplement (https://karger.figshare.com/ndownloader/files/13003919)
Supplement: Supplementary file 1 [file 13003919]

Supplementary Material Figure 1

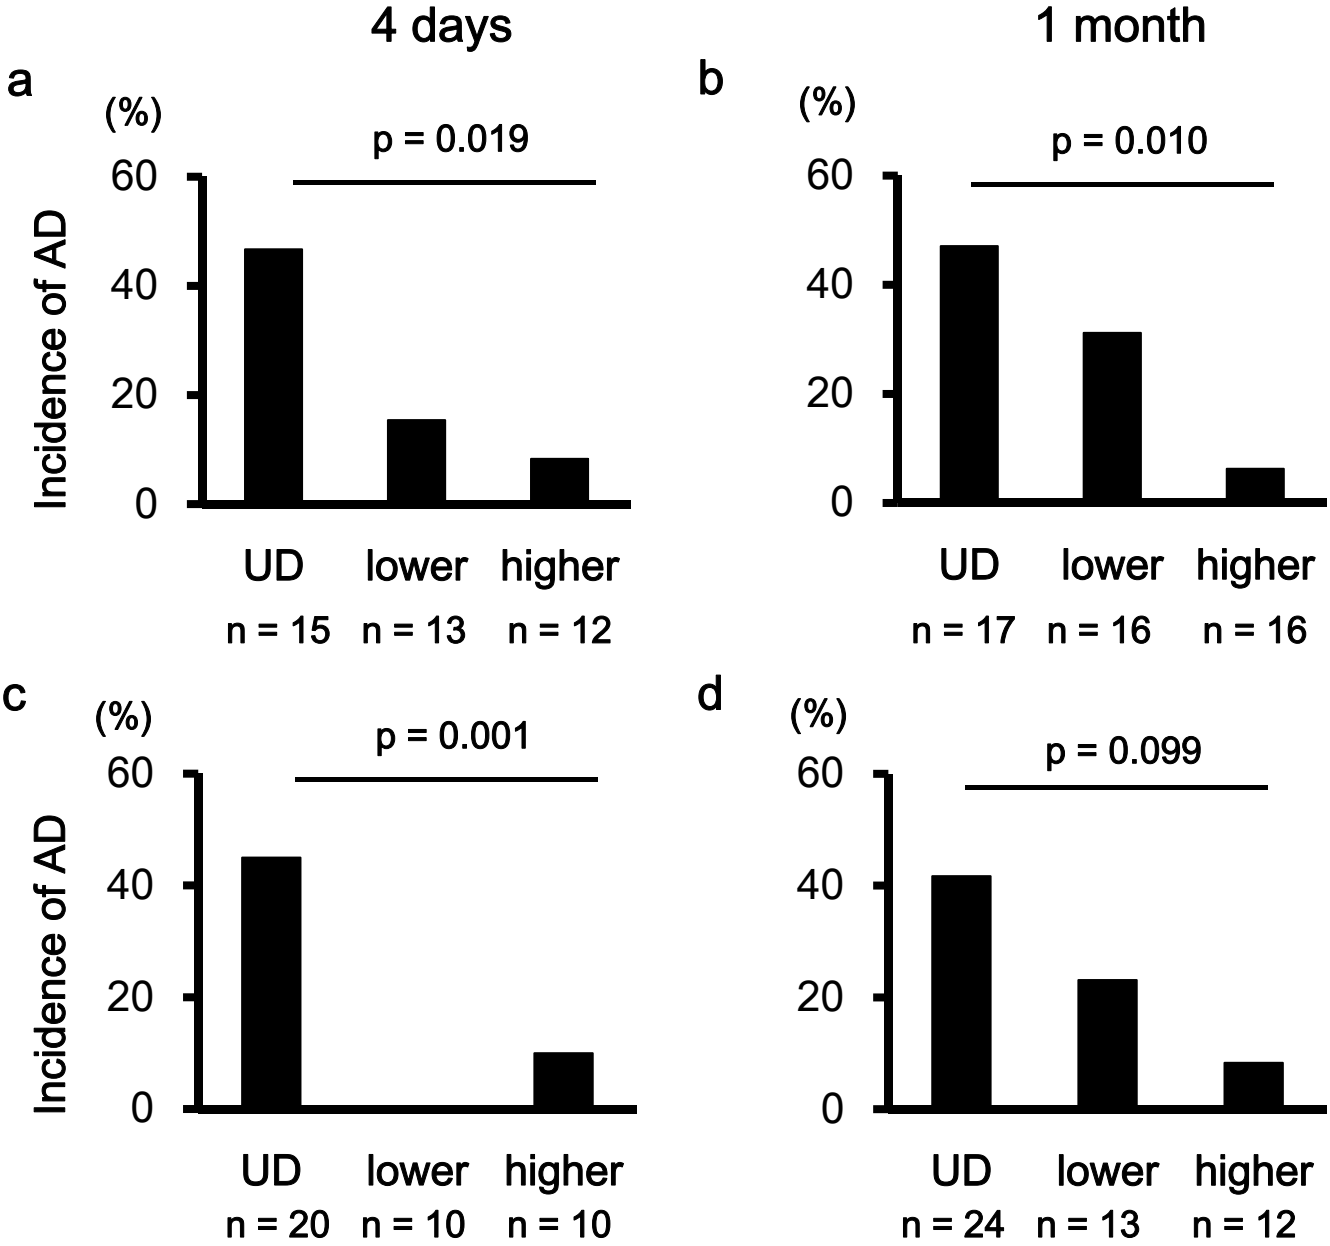

**Suppl. Fig. 1.** Incidence of atopic dermatitis (AD) in infants colonized with *Bifidobacterium* at 4 days (**a**) and at 1 month (**b**) according to the levels of IL-10 release from cord blood mononuclear cells stimulated with heat-killed *Lactobacillus rhamnosus* GG or by *Lactobacillus*-derived peptidoglycan (**c**, **d**). Participants were divided into 3 groups based on IL-10 levels. *P*-values were determined using the Cochran-Armitage test for trend. UD = undetectable, IL-10 = interleukin-10
